# Supplementary material for: Terpenoid Hydrazones as Biomembrane Penetration Enhancers: FT-IR Spectroscopy and Fluorescence Probe Studies
Source: MDPI journal article supplement (doi:10.3390/molecules27010206), 2021-12-29
Supplement: s1 [file s1]

# Supplementary Material: Terpenoid Hydrazones as Biomembrane Penetration Enhancers: FT-IR Spectroscopy and Fluorescence Probe Studies

Mariia Nesterkina, Serhii Smola, Nataliya Rusakova, and Iryna Kravchenko

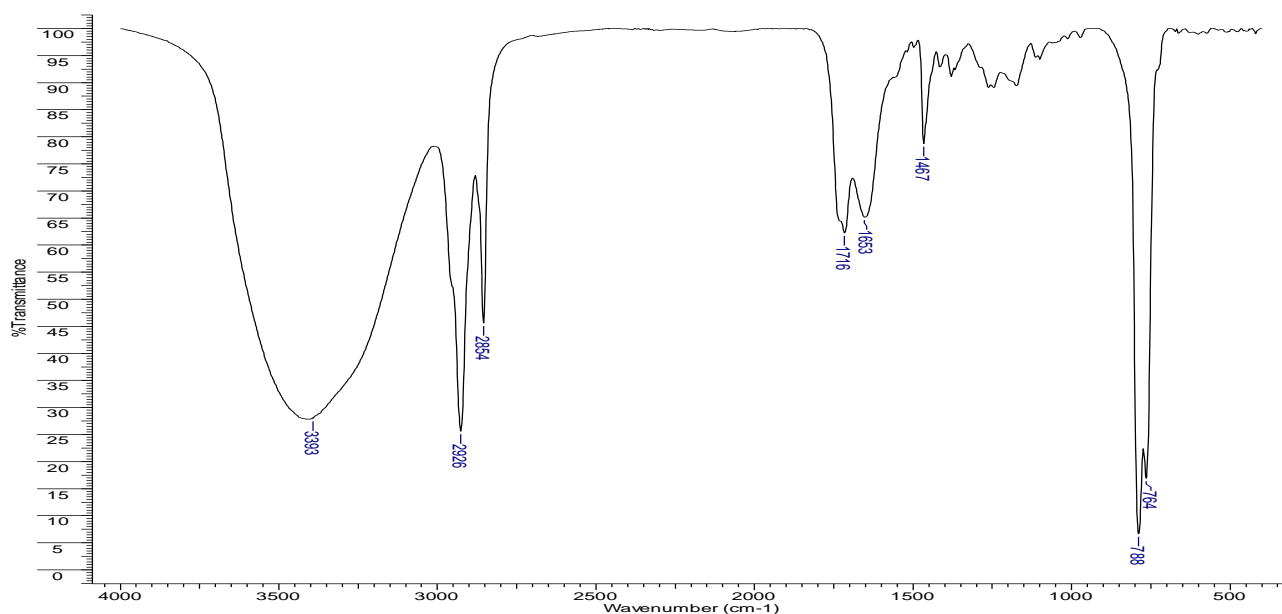

Figure S1. FT-IR spectrum of pure lipids isolated from stratum corneum (SC).

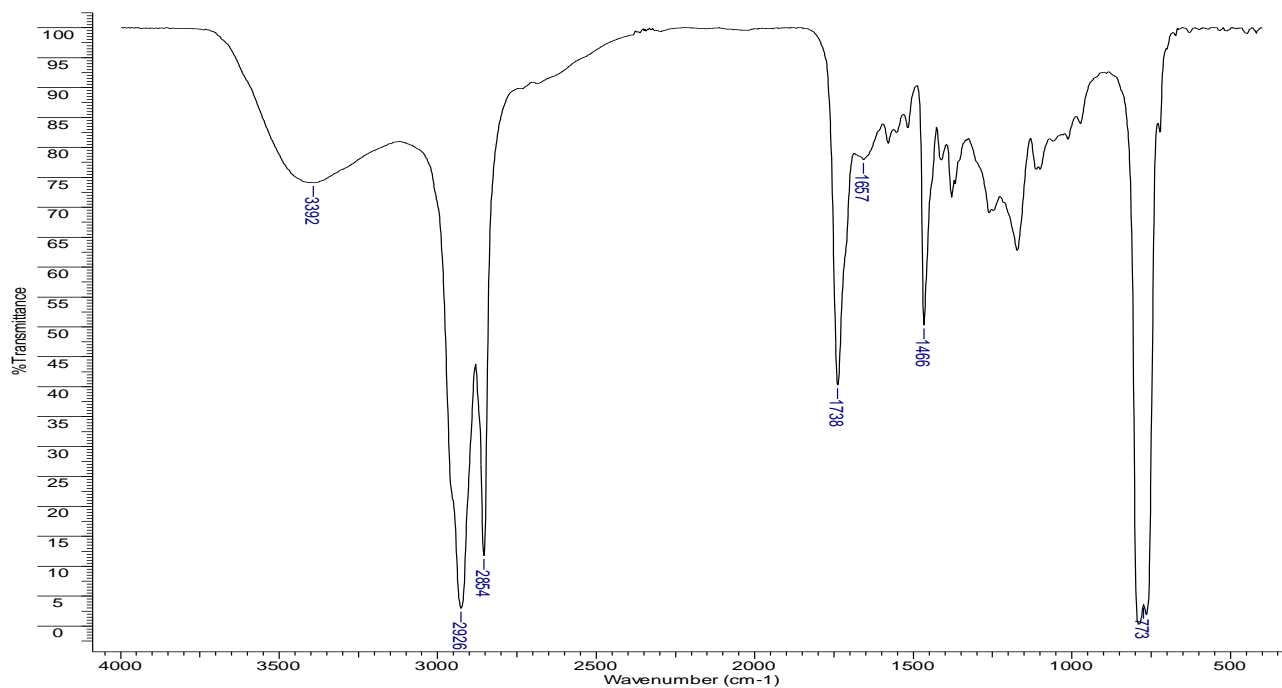

Figure S2. FT-IR spectrum of sample containing verbenone and lipids isolated from SC.

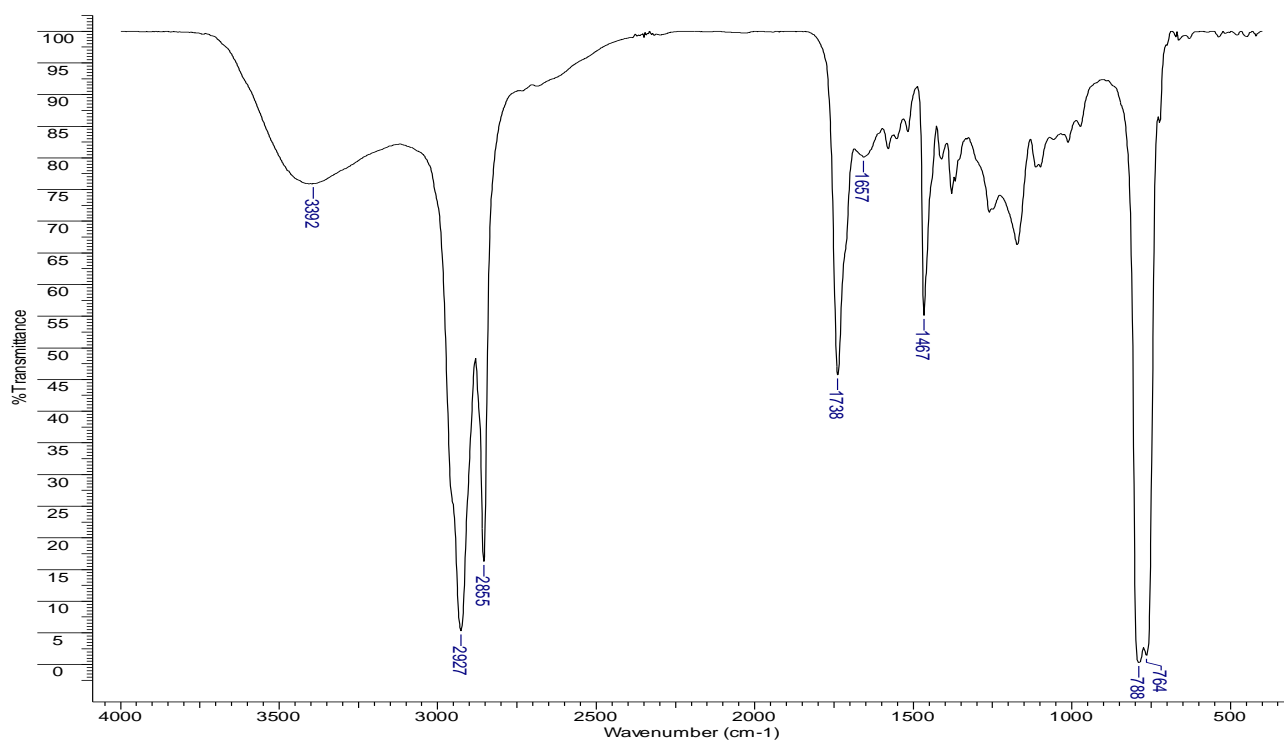

**Figure S3.** FT-IR spectrum of sample containing menthone and lipids isolated from SC.

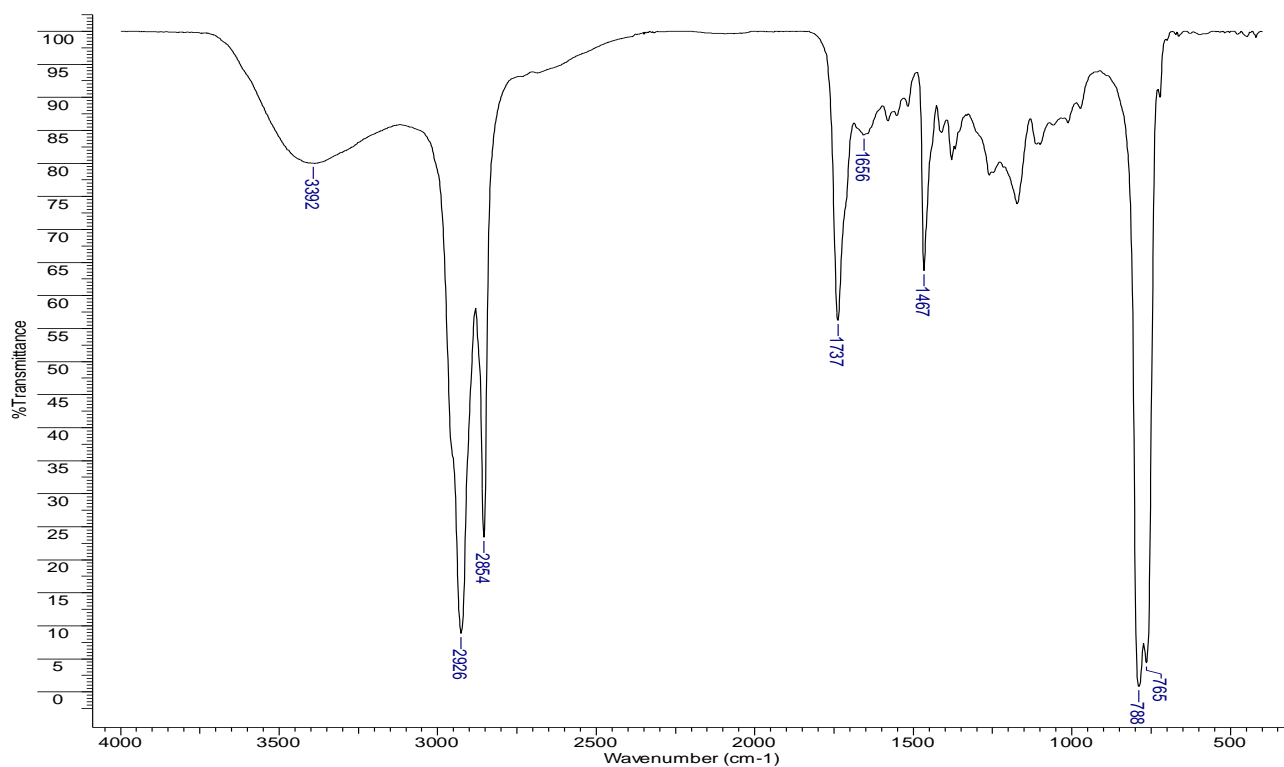

**Figure S4.** FT-IR spectrum of sample containing carvone and lipids isolated from SC.

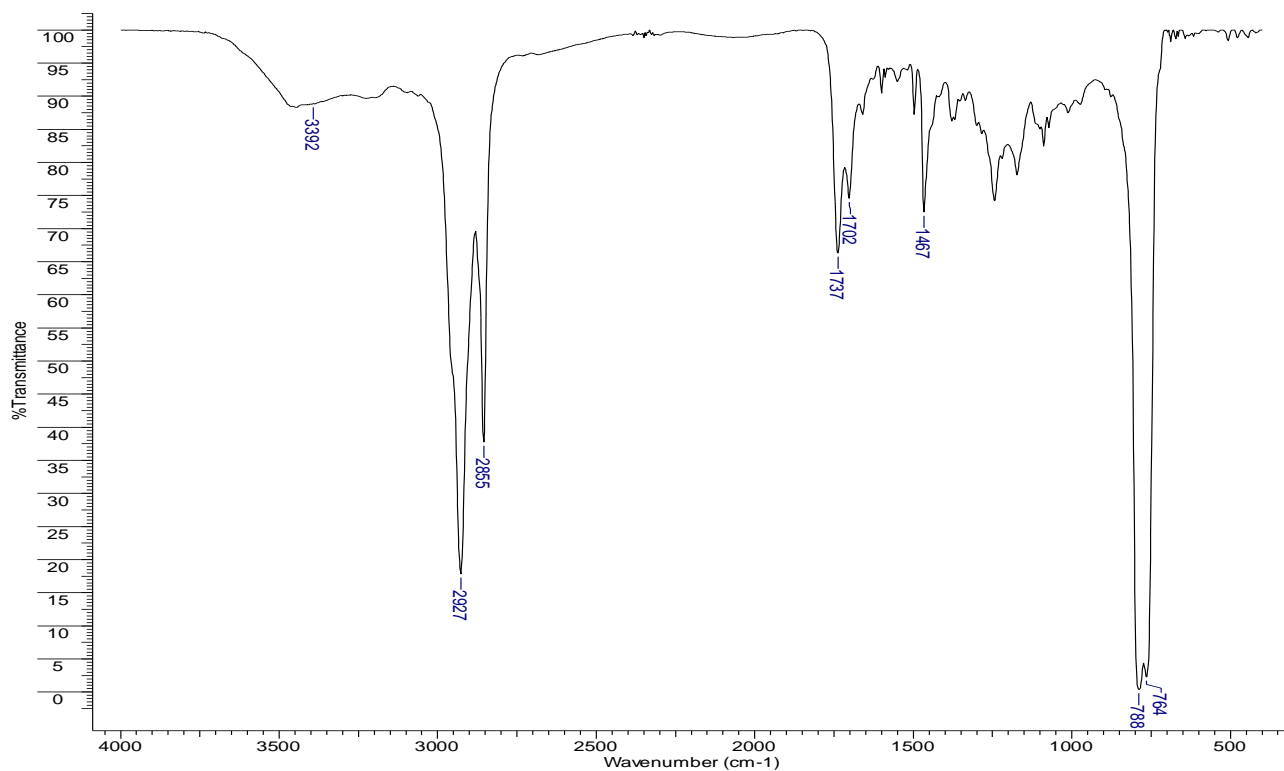

**Figure S5.** FT-IR spectrum of sample containing verbenone hydrazone **1** and lipids isolated from SC.

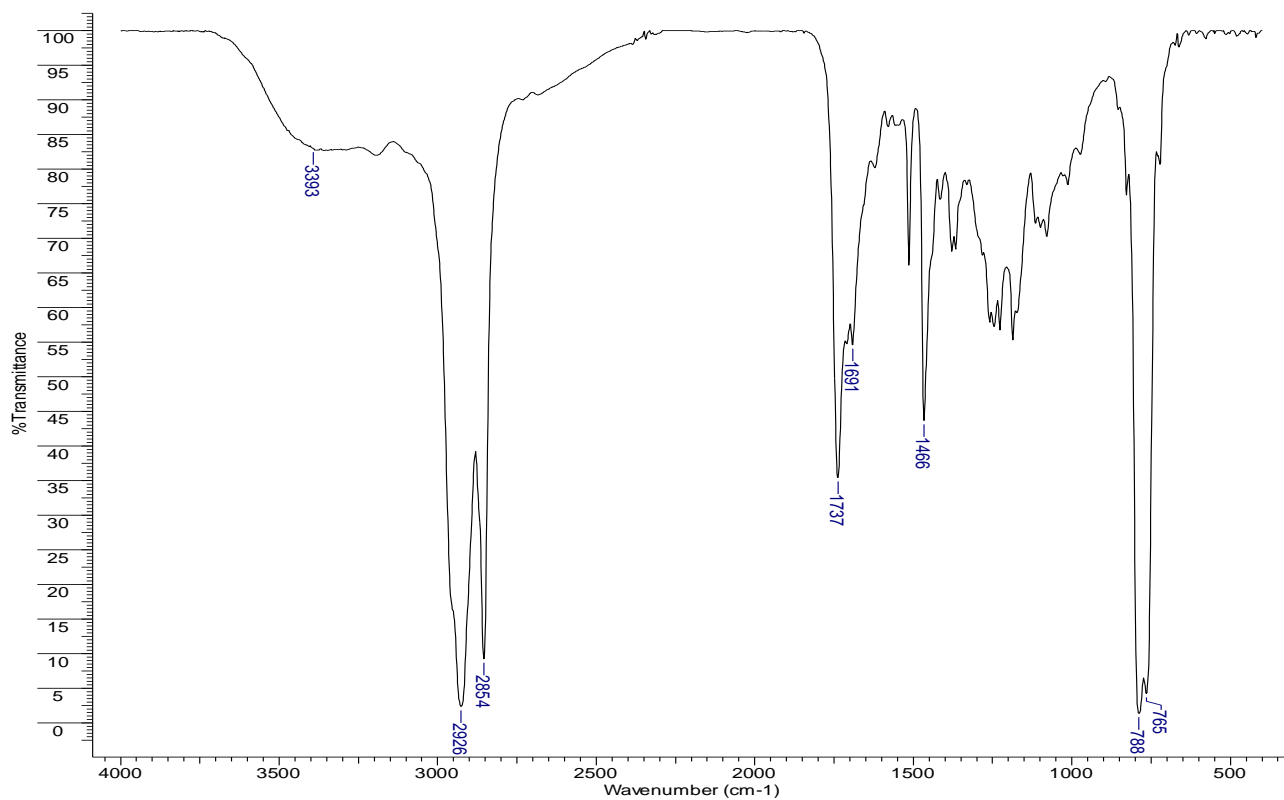

**Figure S6.** FT-IR spectrum of sample containing verbenone hydrazone **2** and lipids isolated from SC.

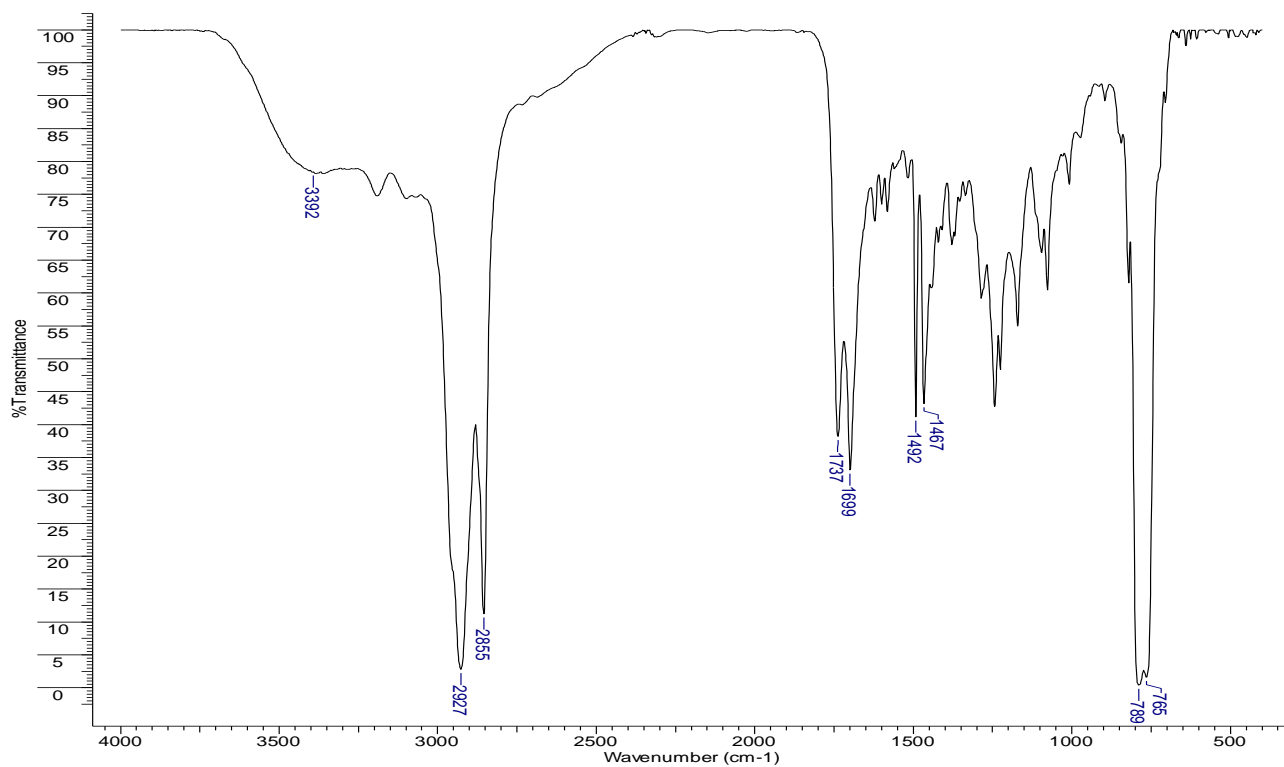

**Figure S7.** FT-IR spectrum of sample containing verbenone hydrazone **3** and lipids isolated from SC.

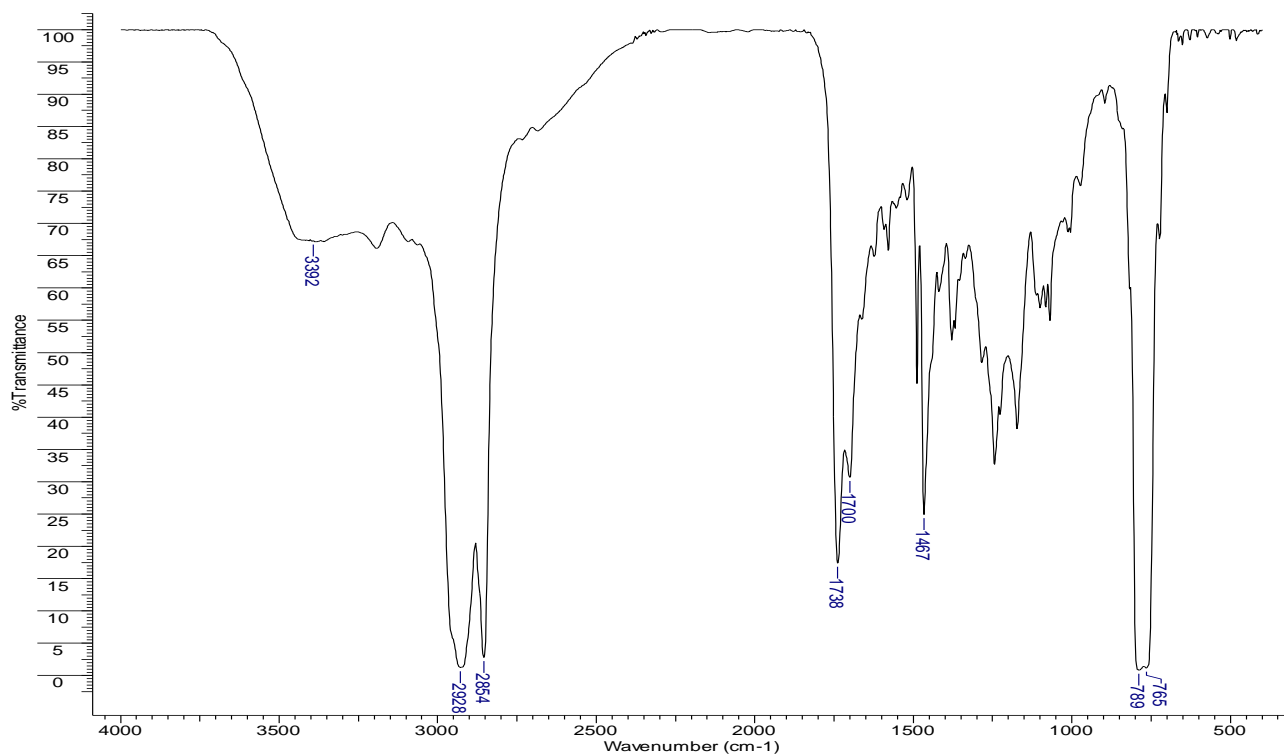

**Figure S8.** FT-IR spectrum of sample containing verbenone hydrazone **4** and lipids isolated from SC.

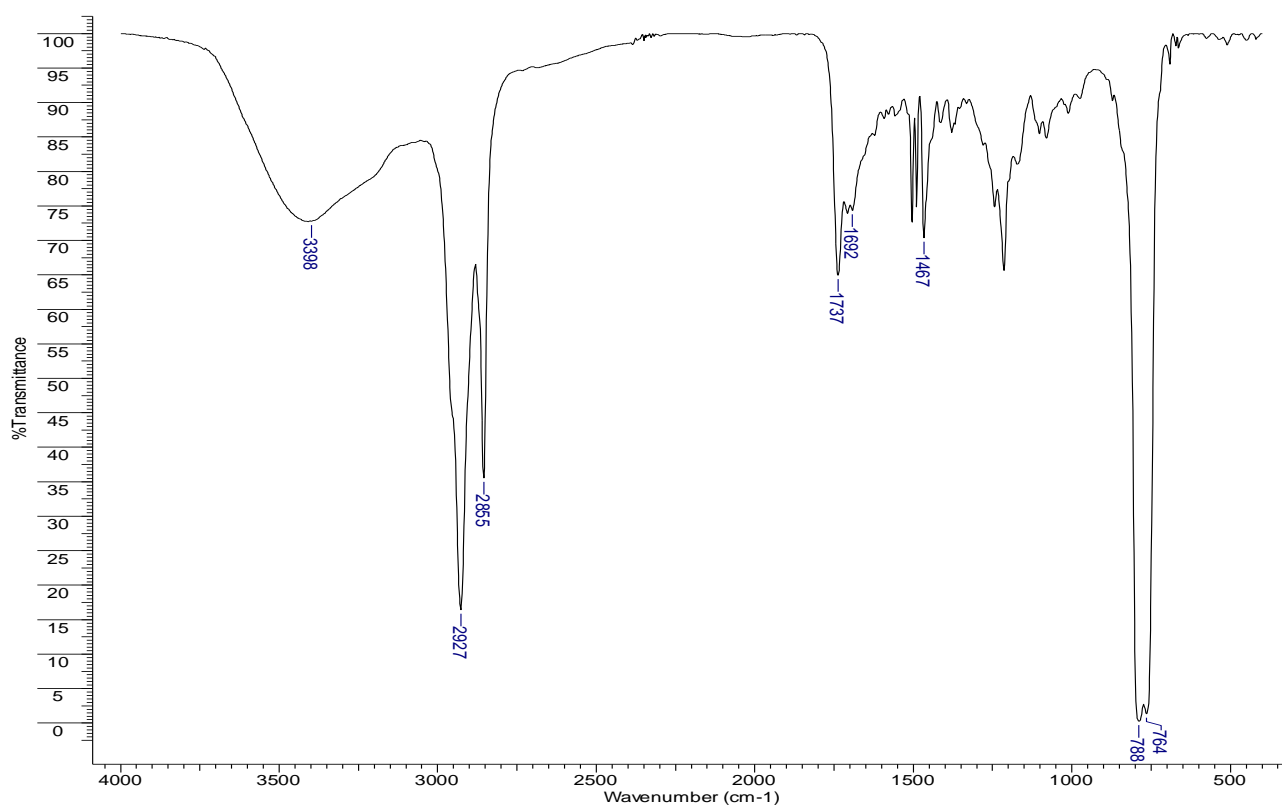

**Figure S9.** FT-IR spectrum of sample containing verbenone hydrazone **5** and lipids isolated from SC.

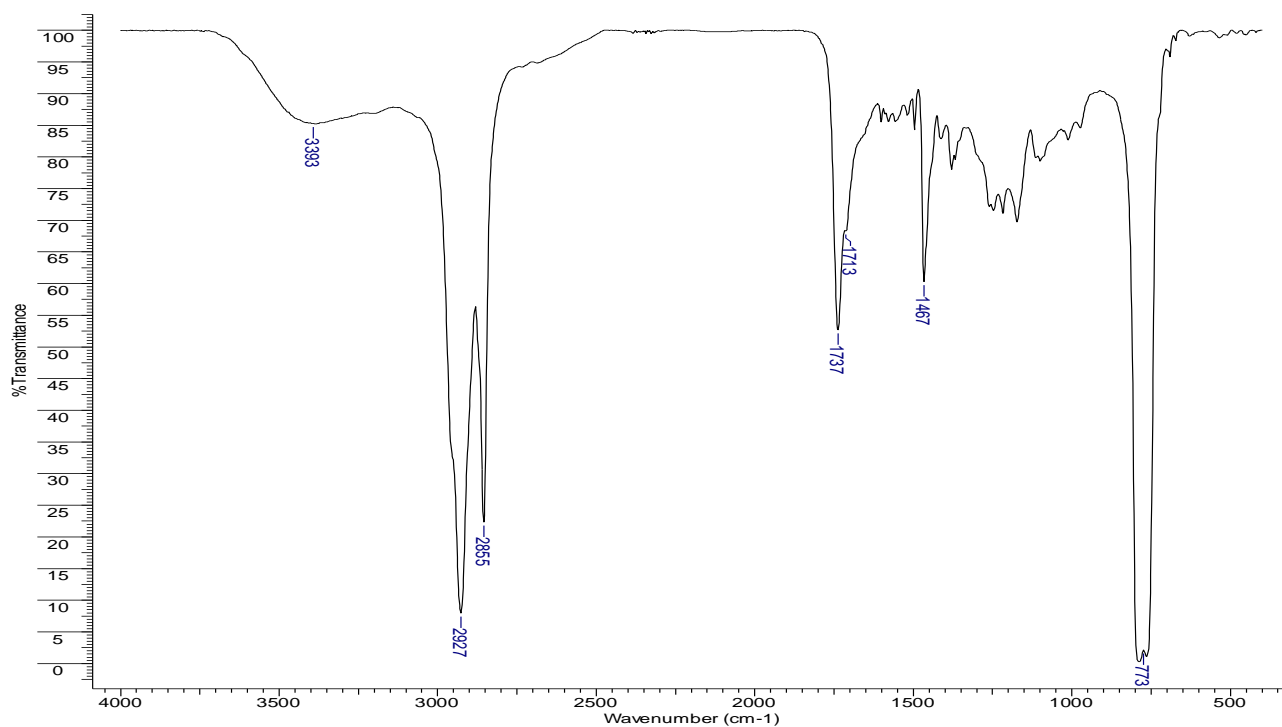

**Figure S10.** FT-IR spectrum of sample containing menthone hydrazone **6** and lipids isolated from SC.

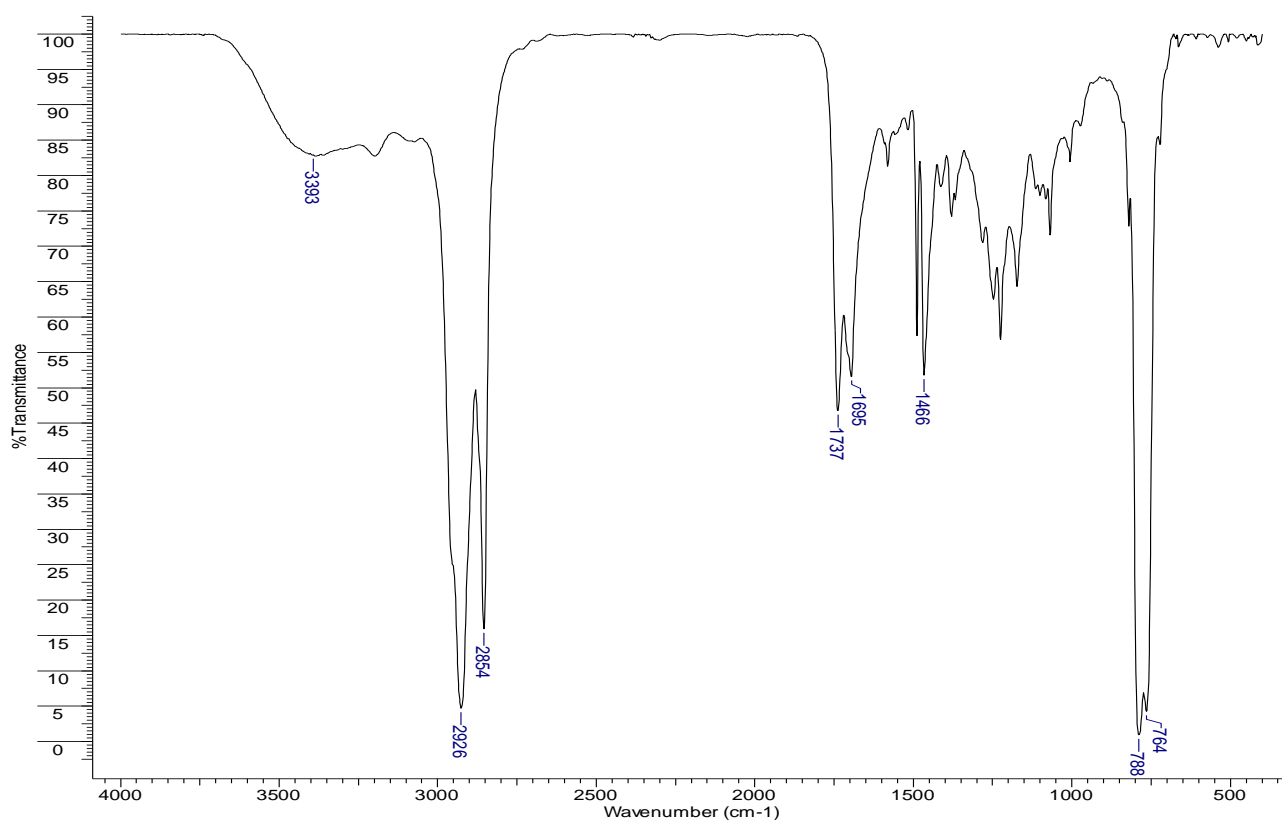

**Figure S11.** FT-IR spectrum of sample containing menthone hydrazone **7** and lipids isolated from SC.

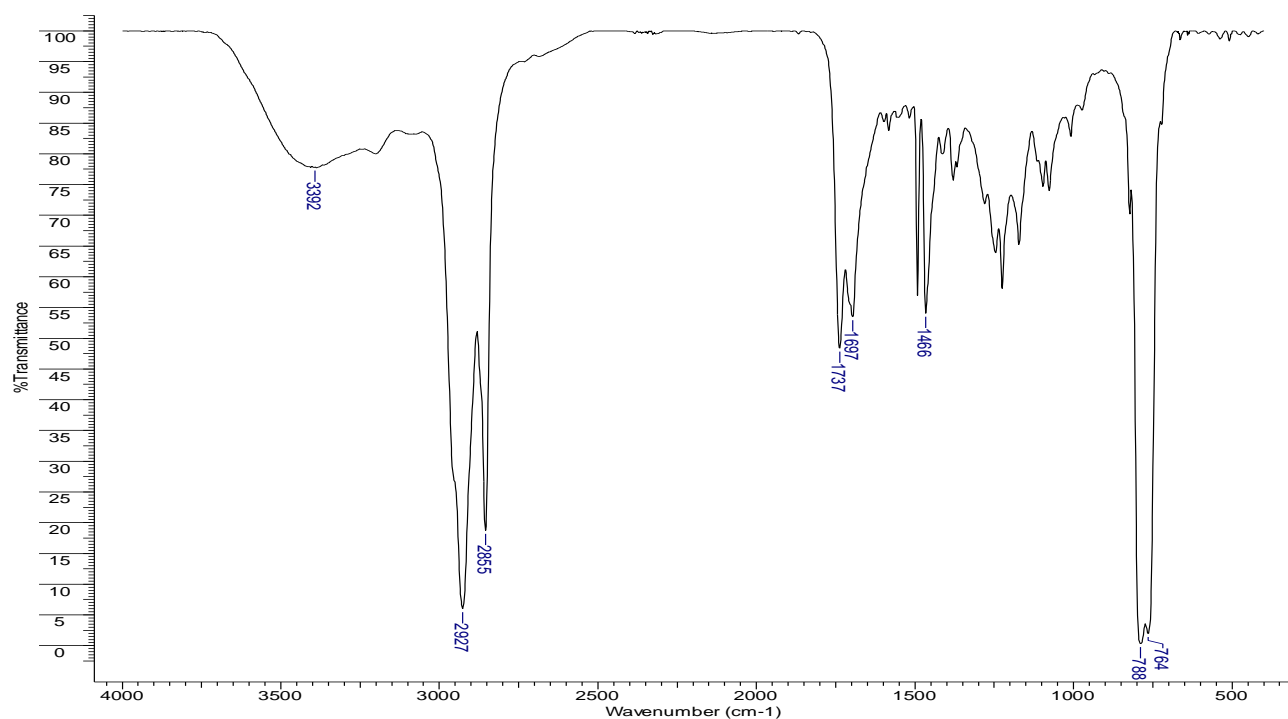

**Figure S12.** FT-IR spectrum of sample containing menthone hydrazone **8** and lipids isolated from SC.

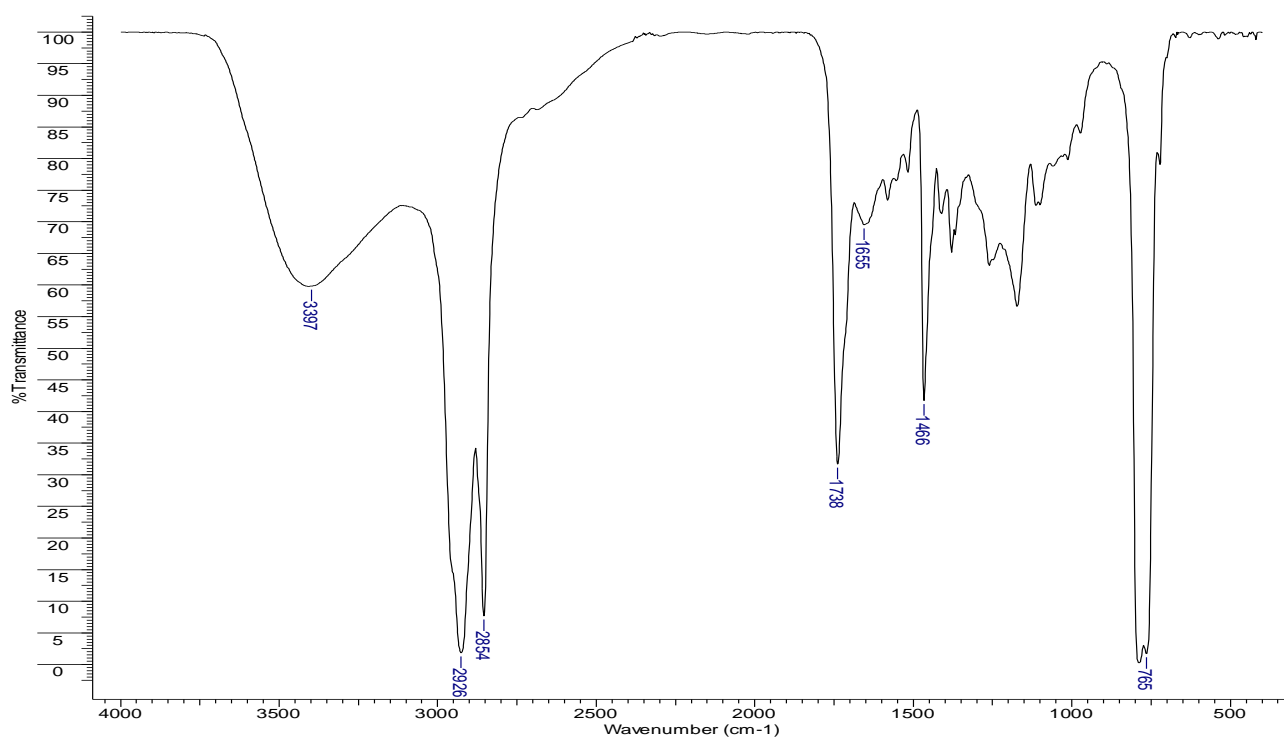

**Figure S13.** FT-IR spectrum of sample containing menthone hydrazone **9** and lipids isolated from SC.

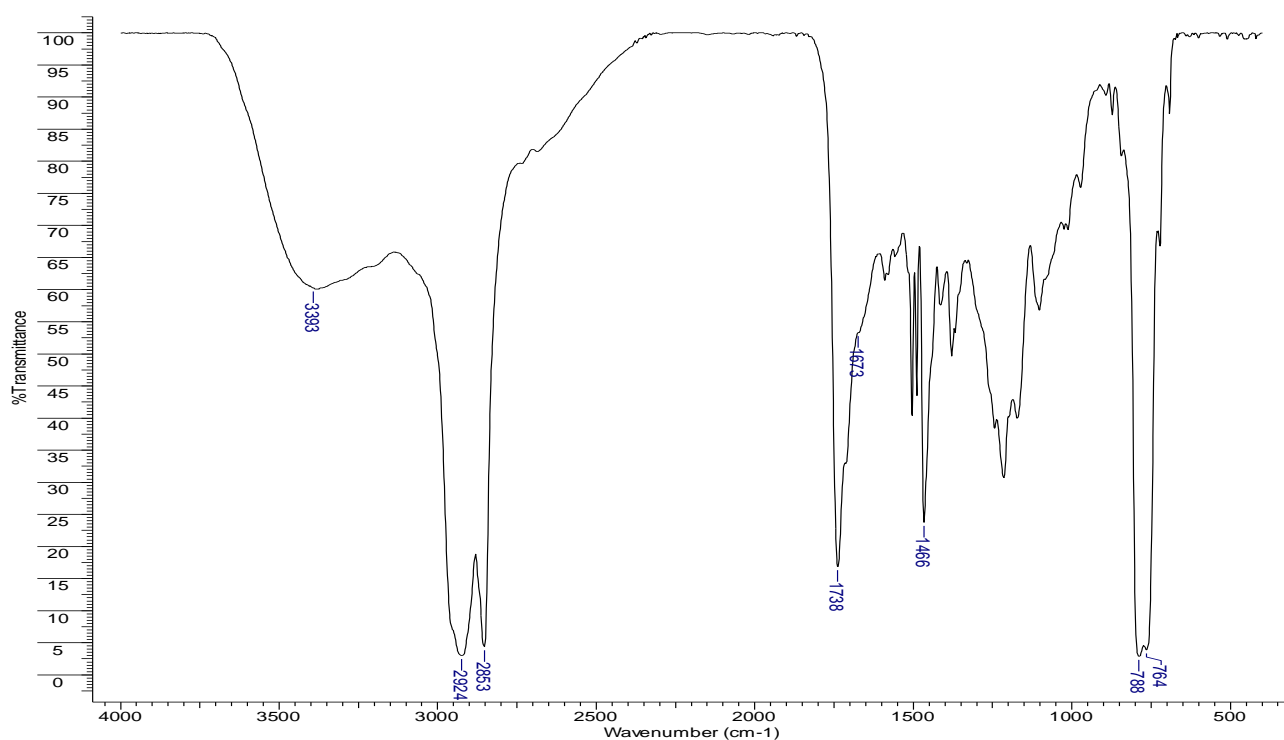

**Figure S14.** FT-IR spectrum of sample containing menthone hydrazone **10** and lipids isolated from SC.

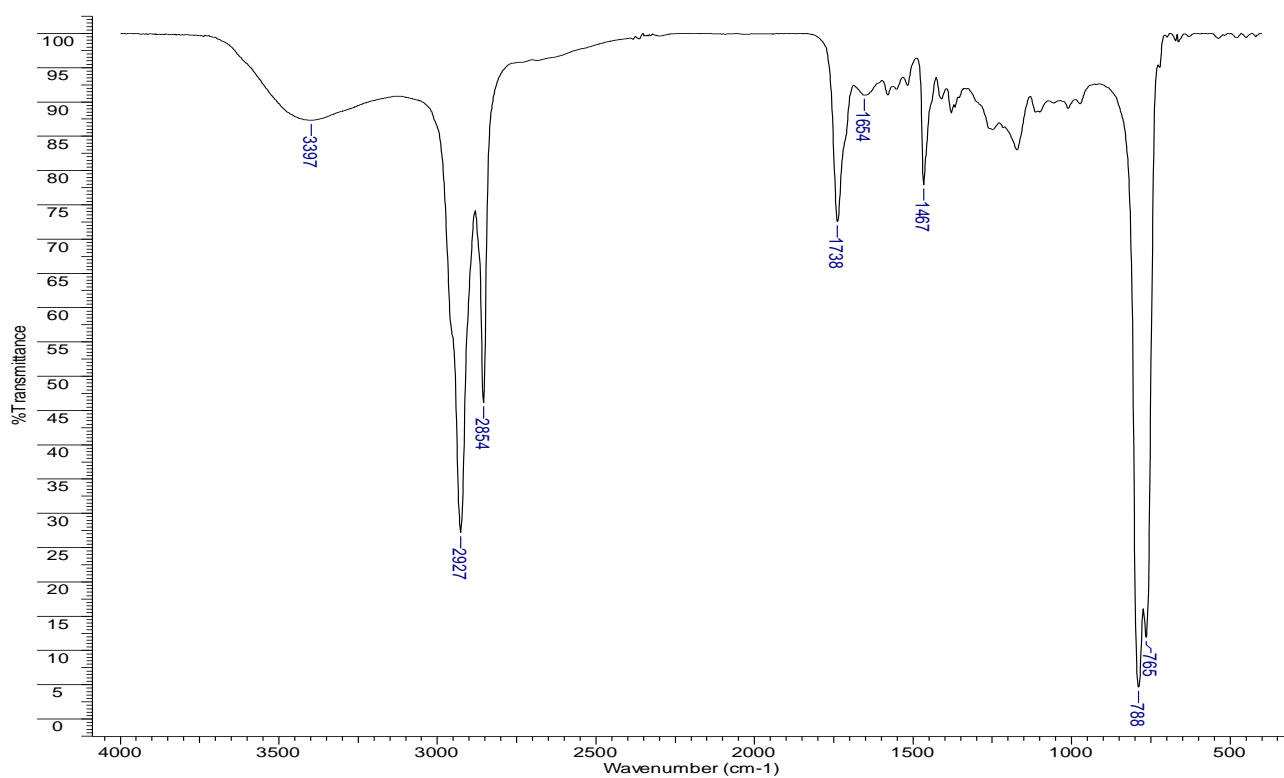

**Figure S15.** FT-IR spectrum of sample containing carvone hydrazone **11** and lipids isolated from SC.

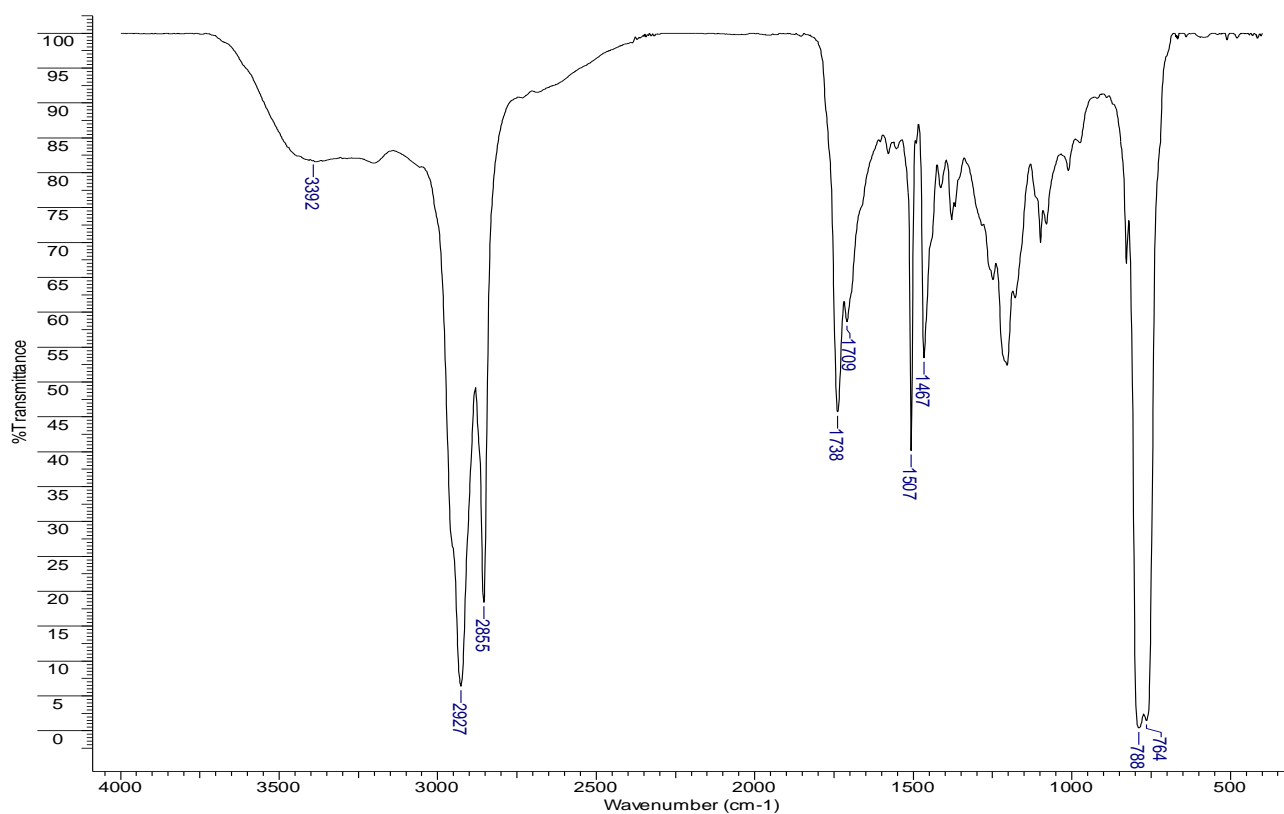

**Figure S16.** FT-IR spectrum of sample containing carvone hydrazone **12** and lipids isolated from SC.



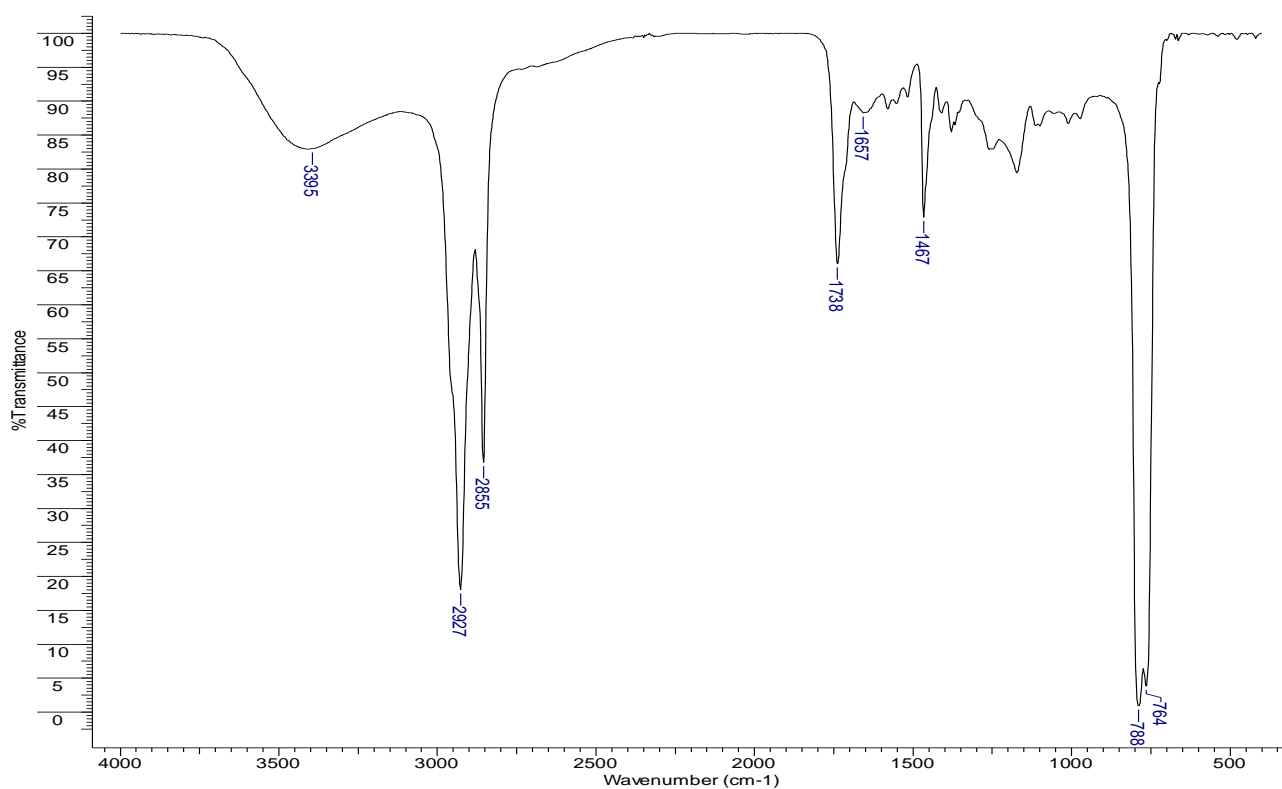

**Figure S17.** FT-IR spectrum of sample containing carvone hydrazone **13** and lipids isolated from SC.

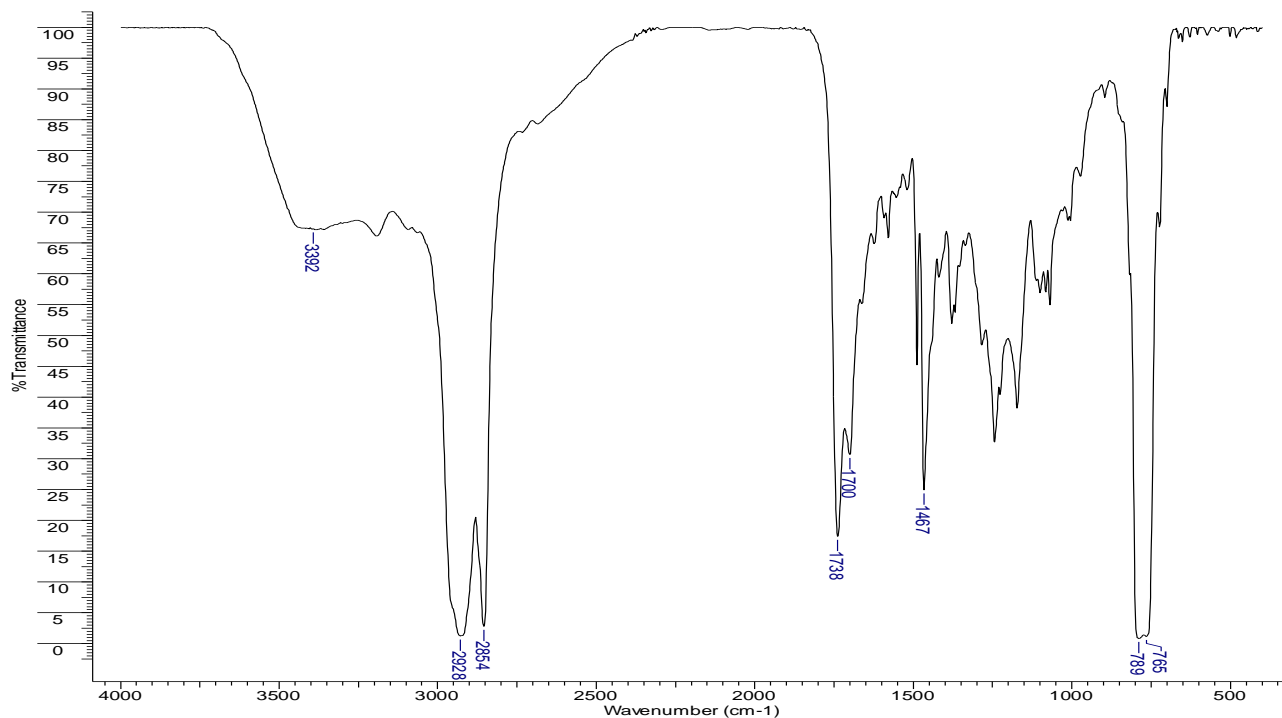

**Figure S18.** FT-IR spectrum of sample containing carvone hydrazone **14** and lipids isolated from SC.

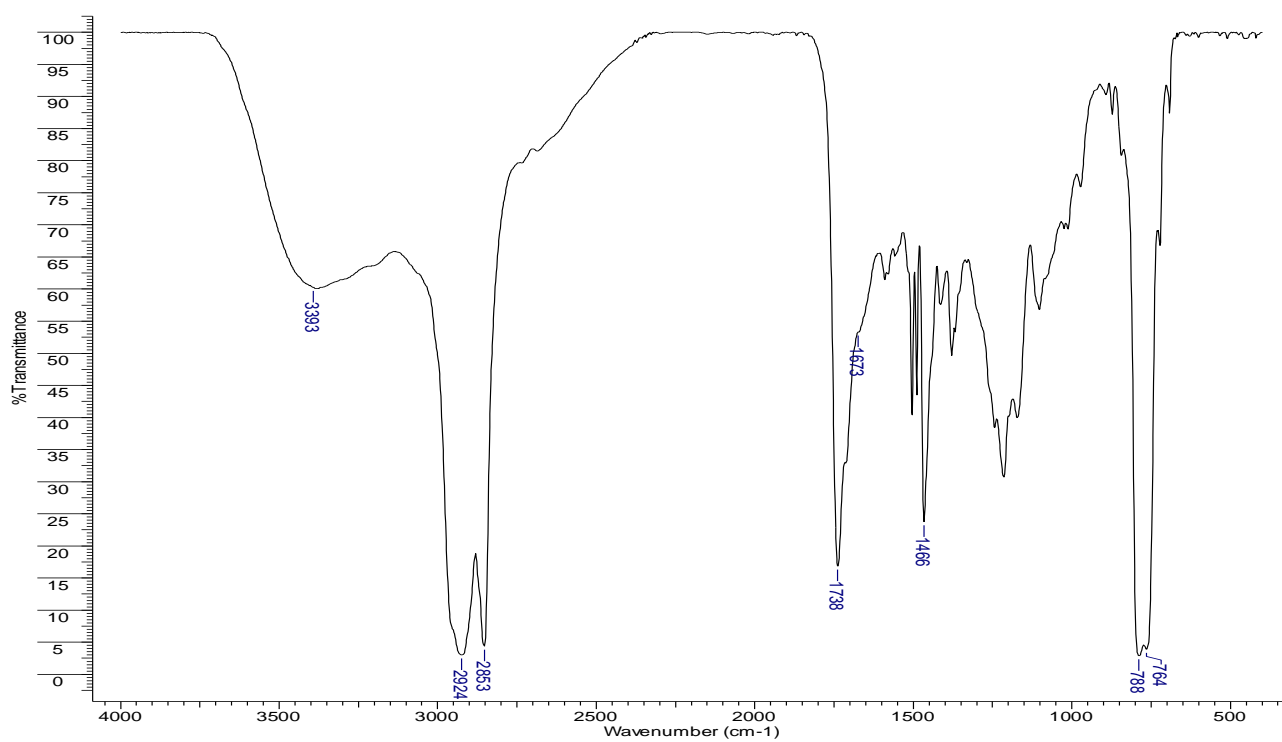

**Figure S19.** FT-IR spectrum of sample containing carvone hydrazone **15** and lipids isolated from SC.
